# Supplementary material
Source: MDPI journal article supplement (https://www.mdpi.com/2410-3888/7/6/383)
Supplement: s1 [file s1]

**Table S1.** GBIF links to each country's database and their references.

| Country            | Database DOI GBIF.org (15 June 2021) GBIF Occurrence Download<br><a href="https://doi.org/">https://doi.org/</a>                                                                                                                                                                                                                                                                                                                                                                                              |
|--------------------|---------------------------------------------------------------------------------------------------------------------------------------------------------------------------------------------------------------------------------------------------------------------------------------------------------------------------------------------------------------------------------------------------------------------------------------------------------------------------------------------------------------|
| <b>Sweden</b>      | <a href="https://doi.org/10.15468/dl.kjcc3n">10.15468/dl.kjcc3n</a><br><a href="https://doi.org/10.15468/dl.4hfdru">10.15468/dl.4hfdru</a><br><a href="https://doi.org/10.15468/dl.9cgua5">10.15468/dl.9cgua5</a><br><a href="https://doi.org/10.15468/dl.938ksp">10.15468/dl.938ksp</a><br><a href="https://doi.org/10.15468/dl.sybve6">10.15468/dl.sybve6</a><br><a href="https://doi.org/10.15468/dl.mkwjmd">10.15468/dl.mkwjmd</a><br><a href="https://doi.org/10.15468/dl.2q657t">10.15468/dl.2q657t</a> |
| <b>Germany</b>     | <a href="https://doi.org/10.15468/dl.6w565m">10.15468/dl.6w565m</a><br><a href="https://doi.org/10.15468/dl.yycxvc">10.15468/dl.yycxvc</a>                                                                                                                                                                                                                                                                                                                                                                    |
| <b>Denmark</b>     | <a href="https://doi.org/10.15468/dl.ru6t4w">10.15468/dl.ru6t4w</a><br>Rask Møller P (2016). Atlas of Danish Fishes. Version 2.1. Zoological Museum, Natural History Museum of Denmark. Occurrence dataset <a href="https://doi.org/10.15468/gekzst">https://doi.org/10.15468/gekzst</a> accessed via GBIF.org on 2021-06-22.                                                                                                                                                                                 |
| <b>Poland</b>      | <a href="https://doi.org/10.15468/dl.kotusz">Kotusz J, De Wever A (2017). Freshwater fishes of Poland. Version 2.2. BioFresh. Occurrence dataset https://doi.org/10.13148/bfcf8 accessed via GBIF.org on 2021-06-15.</a>                                                                                                                                                                                                                                                                                      |
| <b>France</b>      | <a href="https://doi.org/10.15468/dl.cxkprq">10.15468/dl.cxkprq</a><br><a href="https://doi.org/10.15468/dl.pdy8je">10.15468/dl.pdy8je</a>                                                                                                                                                                                                                                                                                                                                                                    |
| <b>Spain</b>       | <a href="https://doi.org/10.15468/dl.fnmmn6">10.15468/dl.fnmmn6</a>                                                                                                                                                                                                                                                                                                                                                                                                                                           |
| <b>Portugal</b>    | <a href="https://doi.org/10.15468/dl.fnmmn6">10.15468/dl.fnmmn6</a>                                                                                                                                                                                                                                                                                                                                                                                                                                           |
| <b>Belgium</b>     | Van Thuyne G, Breine J, Verreycken H, De Boeck T, Brosens D, Desmet P (2021). VIS - Fishes in inland waters in Flanders, Belgium. Version 9.7. Research Institute for Nature and Forest (INBO). Occurrence dataset <a href="https://doi.org/10.15468/gzyxyd">https://doi.org/10.15468/gzyxyd</a> accessed via GBIF.org on 2021-10-28.                                                                                                                                                                         |
| <b>Greece</b>      | <a href="https://doi.org/10.15468/dl.stoumboudi">Stoumboudi M T, De Wever A (2017). Freshwater fishes of Greece. Version 2.2. BioFresh. Occurrence dataset https://doi.org/10.13148/bfcf3 accessed via GBIF.org on 2021-10-29.</a>                                                                                                                                                                                                                                                                            |
| <b>Romania</b>     | <a href="https://doi.org/10.15468/dl.uju5b6">10.15468/dl.uju5b6</a>                                                                                                                                                                                                                                                                                                                                                                                                                                           |
| <b>Netherlands</b> | <a href="https://doi.org/10.15468/dl.verdijk">Verdijk M, Creuwels J, Kranenbarg J (2021). Freshwater fish of the Netherlands, 1800-2019. Version 1.4. Reptile, Amphibian and Fish Conservation Netherlands (RAVON). Occurrence dataset https://doi.org/10.15468/tpmcf accessed via GBIF.org on 2021-05-11.</a>                                                                                                                                                                                                |
| <b>Norway</b>      | <a href="https://doi.org/10.15468/dl.8wgbnh">10.15468/dl.8wgbnh</a>                                                                                                                                                                                                                                                                                                                                                                                                                                           |
| <b>Bulgaria</b>    | De Wever A (2017). Freshwater Fishes of Bulgaria. Version 1.2. BioFresh. Occurrence dataset <a href="https://doi.org/10.13148/bfe107">https://doi.org/10.13148/bfe107</a> accessed via GBIF.org on 2021-06-15.                                                                                                                                                                                                                                                                                                |

**Table S2.** Number of freshwater fish records and species and average completeness by country.

| Country            | Records | Species | Average completeness |
|--------------------|---------|---------|----------------------|
| <b>Belgium</b>     | 25610   | 59      | 31.81                |
| <b>Bulgaria</b>    | 699     | 72      | 0.67                 |
| <b>Denmark</b>     | 49518   | 64      | 65.14                |
| <b>France</b>      | 560728  | 74      | 54.93                |
| <b>Germany</b>     | 39453   | 81      | 17.07                |
| <b>Greece</b>      | 1841    | 111     | 3.16                 |
| <b>Italy</b>       | 37973   | 113     | 16.07                |
| <b>Netherlands</b> | 249009  | 77      | 86.00                |
| <b>Norway</b>      | 80295   | 37      | 39.60                |
| <b>Poland</b>      | 34398   | 76      | 15.93                |
| <b>Portugal</b>    | 21901   | 72      | 26.01                |
| <b>Romania</b>     | 718     | 99      | 0.49                 |

|                       |        |     |       |
|-----------------------|--------|-----|-------|
| <b>Slovenia</b>       | 47122  | 93  | 59.60 |
| <b>Spain</b>          | 61396  | 110 | 21.37 |
| <b>Sweden</b>         | 239928 | 59  | 49.61 |
| <b>United Kingdom</b> | 261094 | 50  | 62.49 |

**Table S3.** Eigenvalues showing the percentage of variances explained by each principal component for the PCA performed to group the 19 bioclimatic predictors.

| <i>Factors</i> | <i>Cumulative variance percentage</i> |
|----------------|---------------------------------------|
| PC1            | 38.11097                              |
| PC2            | 68.93620                              |
| PC3            | 79.78451                              |
| PC4            | 89.17803                              |
| PC5            | 95.33225                              |
| PC6            | 98.08142                              |

**Table S4.** Loading of each of the two factors resulting from the PCA explaining 69% of the climate information.

| <i>Predictor</i>                                                | <i>PC1</i> | <i>PC2</i> |
|-----------------------------------------------------------------|------------|------------|
| BIO1 = Annual Mean Temperature                                  | -0.2900    | -0.2288    |
| BIO2 = Mean Diurnal Range (Mean of monthly (max temp–min temp)) | -0.2229    | 0.0265     |
| BIO3 = Isothermality (BIO2/BIO7) (×100)                         | -0.1856    | -0.2132    |
| BIO4 = Temperature Seasonality (standard deviation ×100)        | -0.0131    | 0.3399     |
| BIO5 = Max Temperature of Warmest Month                         | -0.3312    | -0.0806    |
| BIO6 = Min Temperature of Coldest Month                         | -0.2081    | -0.3110    |
| BIO7 = Temperature Annual Range (BIO5-BIO6)                     | -0.1049    | 0.2787     |
| BIO8 = Mean Temperature of Wettest Quarter                      | -0.1275    | 0.1841     |
| BIO9 = Mean Temperature of Driest Quarter                       | -0.2289    | -0.2741    |
| BIO10 = Mean Temperature of Warmest Quarter                     | -0.3245    | -0.1150    |
| BIO11 = Mean Temperature of Coldest Quarter                     | -0.2360    | -0.3018    |
| BIO12 = Annual Precipitation                                    | 0.2432     | -0.2793    |
| BIO13 = Precipitation of Wettest Month                          | 0.2010     | -0.2602    |
| BIO14 = Precipitation of Driest Month                           | 0.2822     | -0.1646    |
| BIO15 = Precipitation Seasonality (Coefficient of Variation)    | -0.1452    | 0.0002     |
| BIO16 = Precipitation of Wettest Quarter                        | 0.2010     | -0.2656    |
| BIO17 = Precipitation of Driest Quarter                         | 0.2803     | -0.1729    |
| BIO18 = Precipitation of Warmest Quarter                        | 0.3219     | 0.0165     |
| BIO19 = Precipitation of Coldest Quarter                        | 0.1231     | -0.3439    |

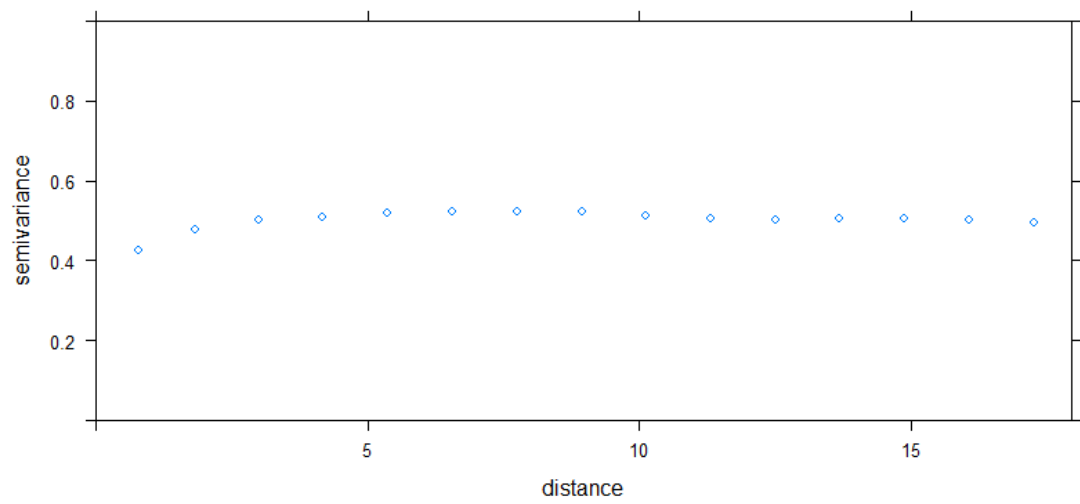

**Figure S1.** Variograms showing low spatial autocorrelation for the GLMM residuals.
